# Supplementary material for: Novel Liver X Receptor Ligand GAC0001E5 Disrupts Glutamine Metabolism and Induces Oxidative Stress in Pancreatic Cancer Cells
Source: MDPI journal article supplement (doi:10.3390/ijms21249622), 2020-12-17
Supplement: s1 [file s1]

## Supplementary Figure Legends

**Supplementary Figure S1:** PDAC cells overexpress LXR $\beta$  and treatment with LXR agonist GW3965 and novel ligand 1E5 showed clear treatment dependent clustering of samples. **A, B** Hierarchical Component Analysis (HCA) plots of metabolic profiles of BxPC-3 and PANC-1 cells, (n=6).

**Supplementary Figure S2:** 1E5 treatment differential gene expression analysis identifies upregulated and downregulated pathways in PDAC cells. **A** Differential gene expression results from RNA-seq were filtered for FPKM > 1 in either treatment group. Genes were then ranked by the test statistic (Wald) from differential expression analysis. GSEA (version 4.0.3) was performed using the c2.cp.v7.0. symbols gene sets. GSEA results were plotted using Enrichment Map (version 3.2.1) with an FDR cutoff of 0.05 and overlap coefficient of 0.5. Red denotes positive enrichment while blue denotes negative enrichment. Darker border color indicates lower FDR. **B** Summary of LXR's novel ligand 1E5's mechanism of action in PDAC cells. 1E5 inhibits glutamine utilization by downregulating glutaminolysis and subsequent anaplerosis of glutamate into TCA cycle, NEAA synthesis and nucleotide biosynthesis. Additionally, by down-regulating glutathione levels 1E5 treatment induces oxidative stress in PDAC cells leading to inhibition of PDAC growth. Created with BioRender.com.

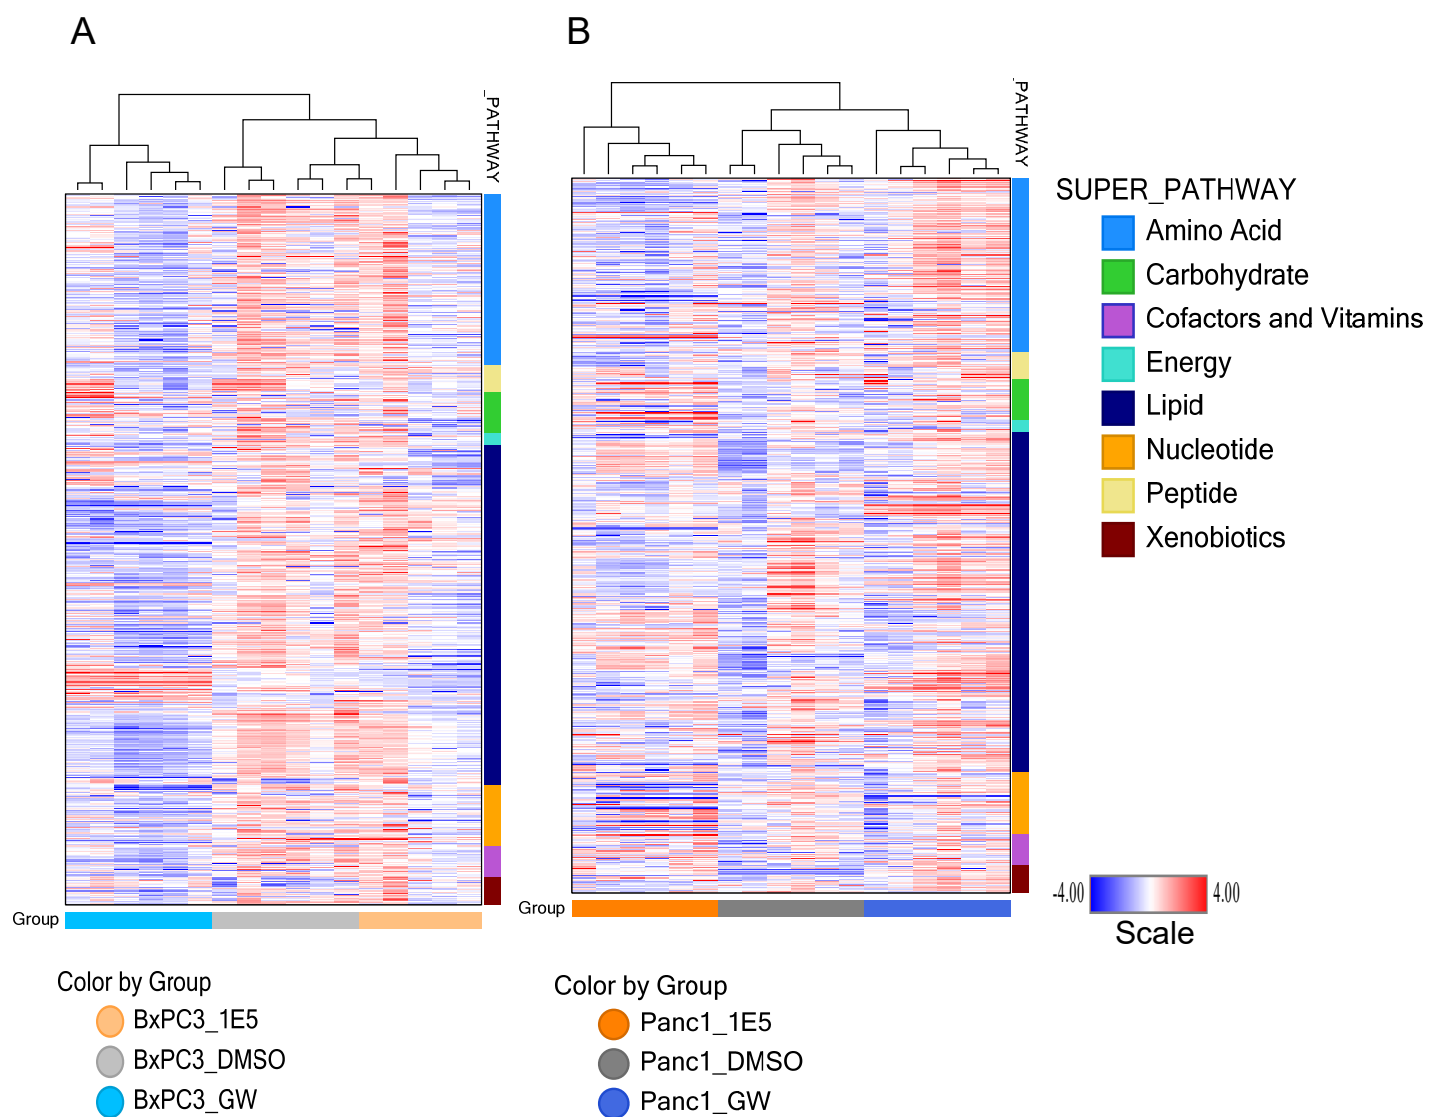

**Supplementary Figure S1**

A

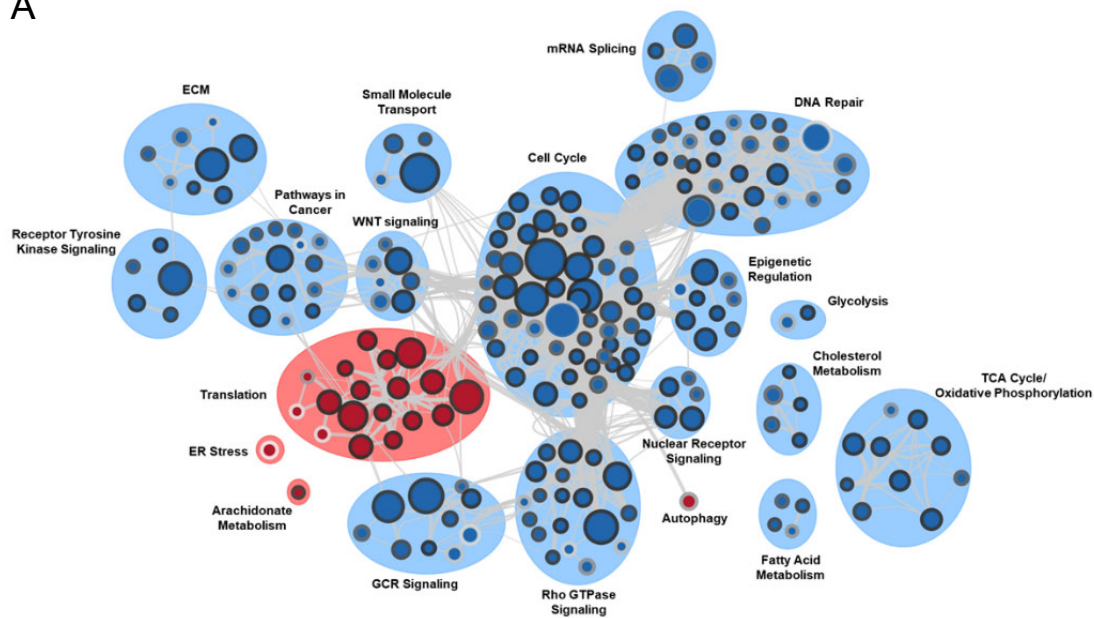

B

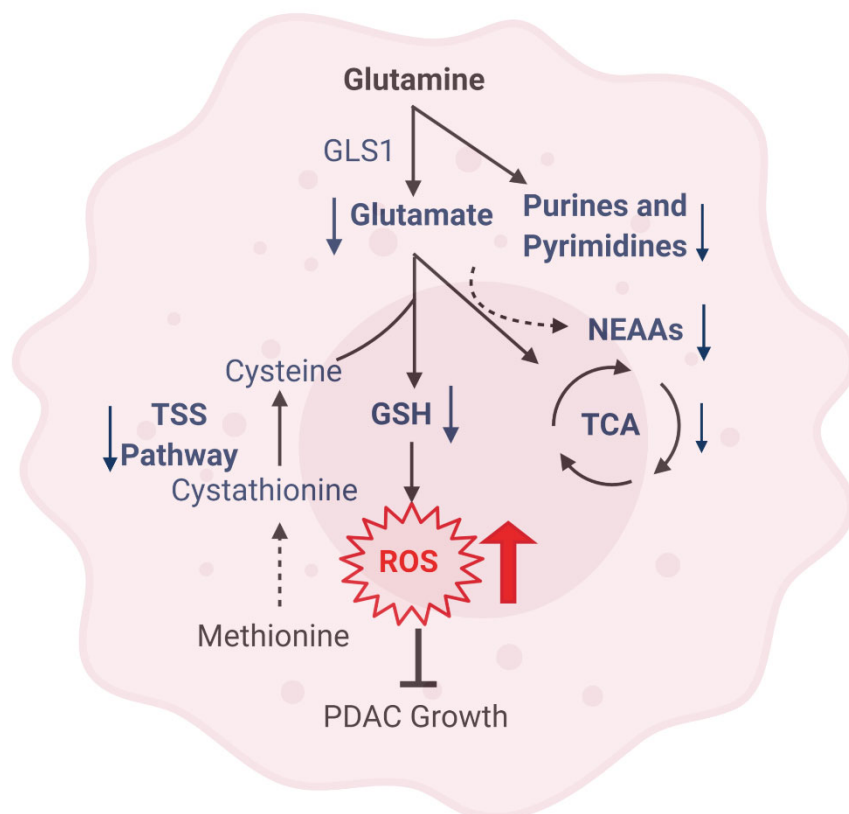

Supplementary Figure S2

| Table S1: Summary of differentially regulated metabolites identified in metabolomics study |             |               |             |               |
|--------------------------------------------------------------------------------------------|-------------|---------------|-------------|---------------|
| Treatment/DMSO                                                                             | GW3965      |               | 1E5         |               |
| Cell Line                                                                                  | Upregulated | Downregulated | Upregulated | Downregulated |
| BxPC-3                                                                                     | 83          | 367           | 97          | 142           |
| PANC-1                                                                                     | 216         | 81            | 177         | 187           |

| Table S2: Joint pathway analysis of PANC-1 cells upon 1E5 treatment |                   |             |          |         |
|---------------------------------------------------------------------|-------------------|-------------|----------|---------|
| Pathway Name                                                        | Total Metabolites | Raw p-value | FDR      | Impact  |
| Purine metabolism                                                   | 225               | 2.19E-75    | 7.24E-73 | 4.5792  |
| Pyrimidine metabolism                                               | 122               | 3.42E-51    | 5.66E-49 | 4.1318  |
| Cysteine and methionine metabolism                                  | 112               | 2.04E-48    | 2.25E-46 | 2.2718  |
| Alanine, aspartate and glutamate metabolism                         | 64                | 1.63E-47    | 1.35E-45 | 4.2623  |
| Central carbon metabolism in cancer                                 | 106               | 9.62E-38    | 6.37E-36 | 0.13274 |
| Glutathione metabolism                                              | 94                | 1.55E-31    | 8.58E-30 | 2.5362  |
| Citrate cycle (TCA cycle)                                           | 50                | 2.29E-30    | 1.08E-28 | 3.1818  |
| Glycolysis or Gluconeogenesis                                       | 99                | 1.23E-25    | 5.10E-24 | 2.4308  |
| Glycine, serine and threonine metabolism                            | 90                | 3.14E-17    | 1.04E-15 | 1.6588  |
| Arginine biosynthesis                                               | 44                | 2.07E-16    | 6.23E-15 | 1.7143  |
| Pyruvate metabolism                                                 | 70                | 4.87E-16    | 1.34E-14 | 1.7925  |

| Table S3: Joint pathway analysis of BxPC-3 cells upon 1E5 treatment |                   |             |                |         |
|---------------------------------------------------------------------|-------------------|-------------|----------------|---------|
| Pathway Name                                                        | Total Metabolites | Raw p-value | FDR            | Impact  |
| Aminoacyl-tRNA biosynthesis                                         | 74                | 2.42E-06    | 0.0002036<br>4 | 0.24658 |
| Arginine biosynthesis                                               | 27                | 8.51E-06    | 0.0003572<br>8 | 0.88462 |
| Alanine, aspartate and glutamate metabolism                         | 61                | 1.53E-05    | 0.0004296<br>2 | 0.95    |
| Purine metabolism                                                   | 166               | 8.23E-05    | 0.0013949      | 0.95758 |
| Valine, leucine and isoleucine biosynthesis                         | 12                | 8.30E-05    | 0.0013949      | 0.72727 |
| Histidine metabolism                                                | 32                | 0.00028326  | 0.0038105      | 0.64516 |
| Arginine and proline metabolism                                     | 78                | 0.00031754  | 0.0038105      | 0.5974  |
| Pyrimidine metabolism                                               | 99                | 0.0005203   | 0.0054631      | 0.91837 |
| Citrate cycle (TCA cycle)                                           | 42                | 0.0023964   | 0.022366       | 0.97561 |
| beta-Alanine metabolism                                             | 44                | 0.0033599   | 0.028223       | 0.7907  |
| Taurine and hypotaurine metabolism                                  | 16                | 0.0041873   | 0.031976       | 0.73333 |
